# Supplementary material for: Transcription is regulated by NusA:NusG interaction
Source: PubMed Central journal article supplement — Nucleic Acids Res. 2016 May 12;44(12):5971–82. doi: 10.1093/nar/gkw423 (PMC4937328; doi:10.1093/nar/gkw423), 2016-05-12
Supplement: supp_gkw423_nar-02482-x-2015-File009.pdf [file supp_gkw423_nar-02482-x-2015-File009.pdf]

# SUPPLEMENTARY INFORMATION

for

## Transcription is regulated by NusA:NusG interaction

Martin Strauß<sup>1</sup>, Christal Vitiello<sup>2</sup>, Kristian Schweimer<sup>1</sup>, Max Gottesman<sup>2,3</sup>, Paul Rösch<sup>1</sup>, and Stefan H.

Knauer<sup>1,\*</sup>

<sup>1</sup>Lehrstuhl Biopolymere und Forschungszentrum für Bio-Makromoleküle, Universität Bayreuth, 95447 Bayreuth, Germany

<sup>2</sup>Department of Microbiology and Immunology, Columbia University Medical Center, New York, NY 10032, USA

<sup>3</sup>Department of Biochemistry and Molecular Biophysics, Columbia University Medical Center, New York, NY 10032, USA

\* To whom correspondence should be addressed. Tel: 0049 921 553868; Fax: 0049 921 16490459; Email: stefan.knauer@uni-bayreuth.de

Present Address: Martin Strauß, Department of Microbiology and Immunology, Columbia University Medical Center, New York, NY 10032, USA Department, Institution, Town, State, Postcode, Country

### Contents:

|                                |           |
|--------------------------------|-----------|
| <b>Supplementary Figure S1</b> | <b>2</b>  |
| <b>Supplementary Figure S2</b> | <b>3</b>  |
| <b>Supplementary Figure S3</b> | <b>4</b>  |
| <b>Supplementary Figure S4</b> | <b>6</b>  |
| <b>Supplementary Figure S5</b> | <b>7</b>  |
| <b>Supplementary Figure S6</b> | <b>8</b>  |
| <b>Supplementary Figure S7</b> | <b>9</b>  |
| <b>Supplementary Figure S8</b> | <b>10</b> |

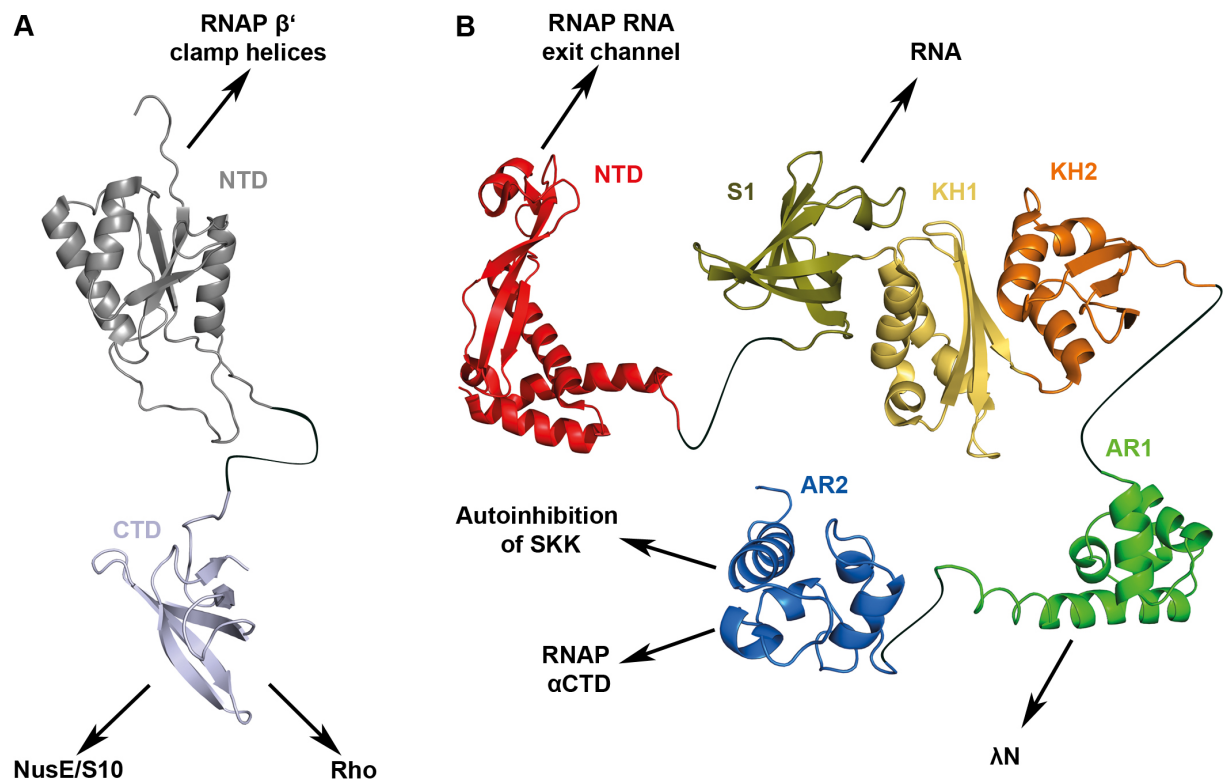

**Supplementary Figure S1. Three-dimensional structures of (A) NusG and (B) NusA.** Protein structures are in cartoon representation. Arrows indicate the interaction partner(s) of individual domains. **(A)** NusG from *E. coli*. NusG-NTD, gray, PDB ID: 2K06; NusG-CTD, light blue, PDB ID: 2JVJ; flexible linker, black line. **(B)** NusA from *E. coli*. NusA-NTD, red, PDB ID: 2KWP; NusA-S1, olive; NusA-KH1, yellow; NusA-KH2, orange (as no structure of *E. coli* NusA-SKK is available the structure of *Thermotoga maritima* NusA-SKK is shown, PDB ID: 1HH2); NusA-AR1, green, PDB ID: 1WCL; NusA-AR2, blue, PDB ID: 1WCN; linker, black line.

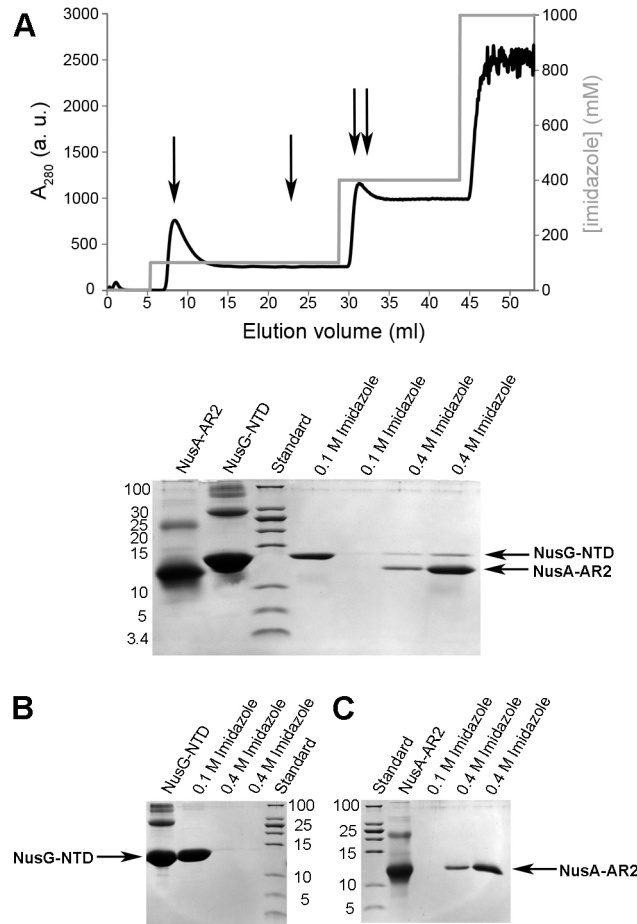

**Supplementary Figure S2. Pull-down of NusG-NTD with His<sub>10</sub>-NusA-AR2.** (A) His<sub>10</sub>-NusA-AR2 (200  $\mu$ M) and NusG-NTD (400  $\mu$ M) were preincubated for 15 min and then applied to a 1 ml HisTrap column. After washing, stepwise elution was carried out with 100 and 400 mM imidazole. (Upper panel) Chromatogram of the pull-down assay. Arrows indicate the fractions analyzed by sodium dodecylsulfate (SDS) polyacrylamide gel electrophoresis. (lower panel) 20 % SDS polyacrylamide gel of samples taken during the pull-down assay. NusA-AR2, pure His<sub>10</sub>-NusA-AR2; NusG-NTD, pure NusG-NTD; 0.1 M imidazole, elution with 100 mM imidazole; 0.4 M imidazole, elution with 400 mM imidazole. (B,C) Control experiments with (B) NusG-NTD and (C) His<sub>10</sub>-NusA-AR2. Isolated NusG-NTD (400  $\mu$ M) or His<sub>10</sub>-NusA-AR2 (200  $\mu$ M) was applied to the column and treated like in (A).

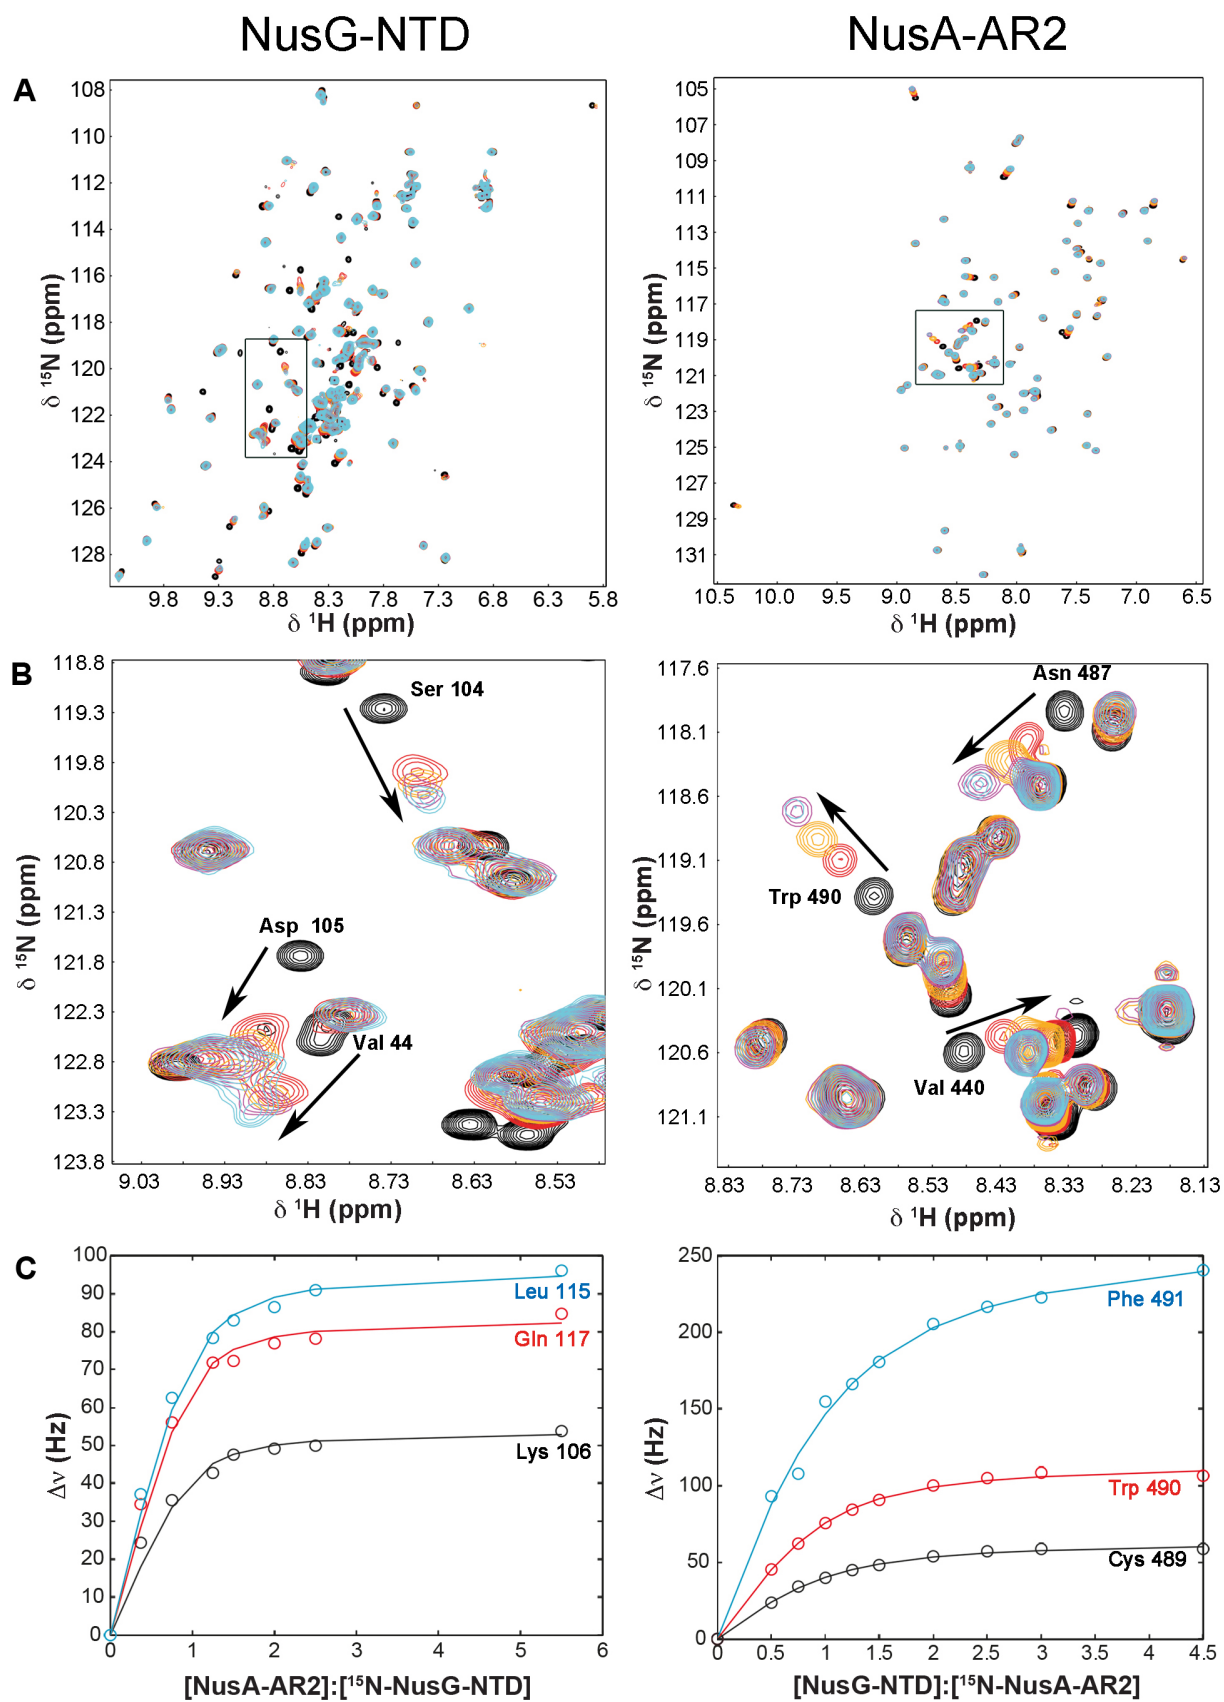

**Supplementary Figure S3. Determination of  $K_D$  values of the NusA-AR2:NusG-NTD complex.** (A, left) [ $^1\text{H}$ ,  $^{15}\text{N}$ ]-HSQC titration of  $^{15}\text{N}$ -NusG-NTD (140  $\mu\text{M}$ ) with NusA-AR2. NusA-AR2 was added in



molar ratios of 1:0, black, 1:0.75, red, 1:1.25, orange, 1:2.5, magenta, and 1:3.5, cyan. (right) [ $^1\text{H}$ ,  $^{15}\text{N}$ ]-HSQC titration of  $^{15}\text{N}$ -NusA-AR2 with NusG-NTD. Spectra corresponding to molar ratios 1:0, 1:0.5, 1:1, 1:2.5, and 1:3 are in black, red, orange, magenta, and cyan, respectively. **(B)** Magnifications of **(A)**. Selected signals are labeled. **(C)** Backbone amide chemical shift perturbations for selected residues obtained from **(A)** vs. molar ratio of the titration partners. (Left)  $^{15}\text{N}$ -NusG-NTD+NusA-AR2; (right)  $^{15}\text{N}$ -NusA-AR2 + NusG-NTD. The lines represent nonlinear least squares best fits of the normalized changes in the  $^1\text{H}$  and  $^{15}\text{N}$  chemical shifts, based on a bimolecular equilibrium binding model. The optimized average  $K_D$  values are 13  $\mu\text{M}$  for  $^{15}\text{N}$ -NusG-NTD + NusA-AR2 and 35  $\mu\text{M}$  for  $^{15}\text{N}$ -NusA-AR2 + NusG-NTD, yielding an overall  $K_D$  of approximately 22  $\mu\text{M}$  for the NusA-AR2:NusG-NTD interaction.

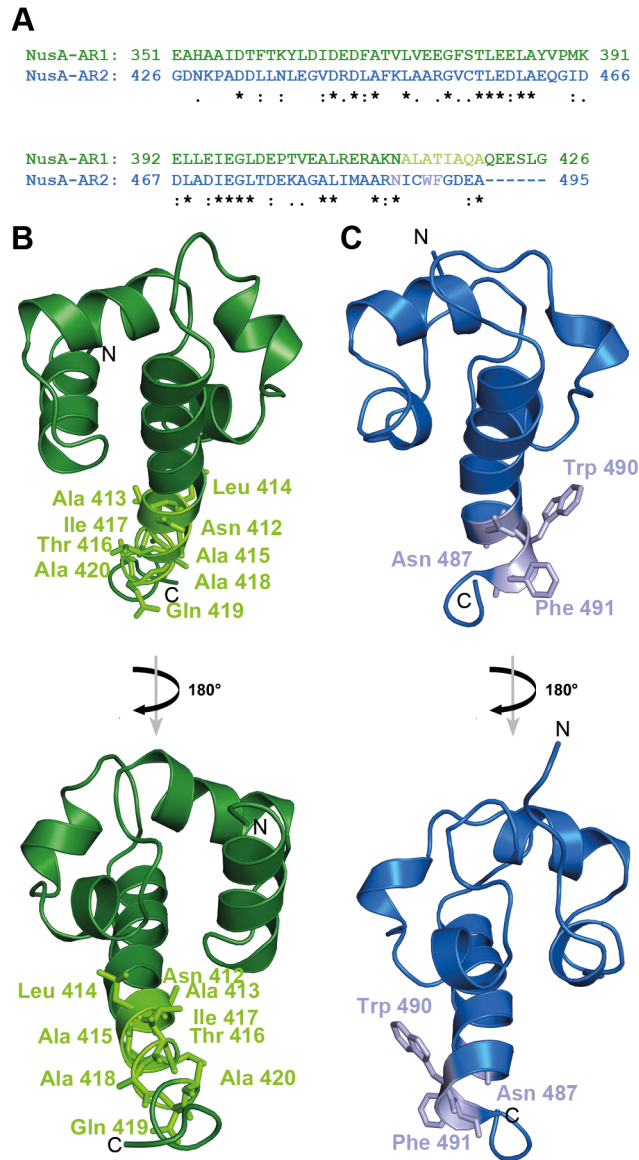

**Supplementary Figure S4. Comparison of NusA-AR1 and NusA-AR2.** (A) Amino acid sequence alignment of NusA-AR1 and NusA-AR2. Asterisk, identical amino acids; colon, conservation between groups of strongly similar properties; dot, conservation between groups of weakly similar properties. (B,C) Structures of (A) NusA-AR1, green, and (B) NusA-AR2, blue, both in cartoon representation. Residues of NusA-AR2 which are strongly affected by NusG-NTD binding ( $\Delta\delta_{\text{norm}} > 0.12$  ppm) as well as corresponding residues in NusA-AR1 are shown as sticks in light colours and labelled. PDB IDs: NusA-AR1, 1WCL; NusA-AR2, 1WCN. .

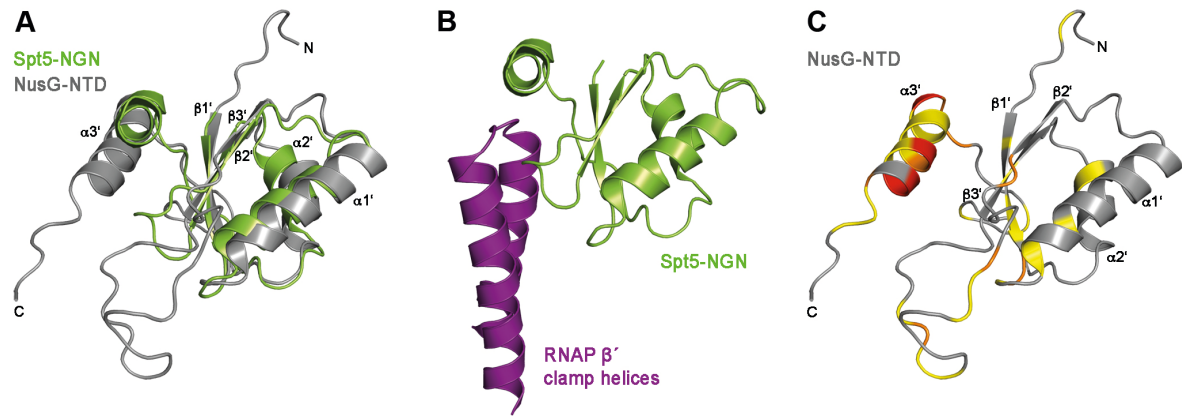

**Supplementary Figure S5. Binding of NusG proteins to RNAP  $\beta'$ CH.** (A) Superposition of Spt5-NusG N-terminal domain (NGN) from *Pyrococcus furiosus* (*P. furiosus*, green, PDB ID: 3QQC) and NusG-NTD from *E. coli* (grey, PDB ID: 2K06), both in cartoon representation. (B) Spt5-NGN bound to the  $\beta'$ CH (purple) in *P. furiosus* (PDB ID: 3QQC). (C) NusG-NTD in the same orientation as in (A). Residues that are affected by the interaction with NusA-AR2 are in red (strongly affected), orange (moderately affected), and yellow (slightly affected), see Figure 3.

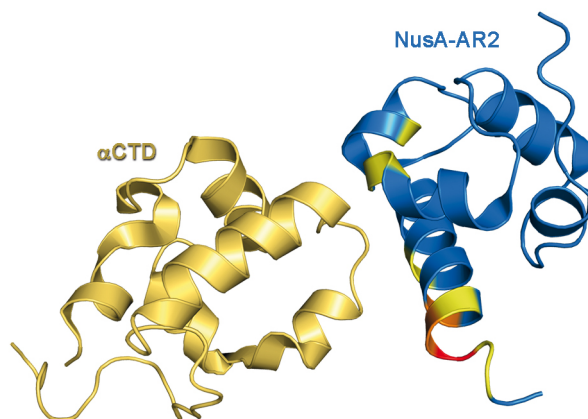

**Supplementary Figure S6. The NusA-AR2 binding sites for  $\alpha$ CTD and NusG-NTD overlap.** Solution structure of the NusA-AR2: $\alpha$ CTD complex (PDB ID: 2JZB, cartoon representation). Dark yellow,  $\alpha$ CTD; blue, NusA-AR2. Residues of NusA-AR2 that are affected by the interaction with NusG-NTD are in red (strongly affected), orange (moderately affected), and yellow (slightly affected), see Figure 3.

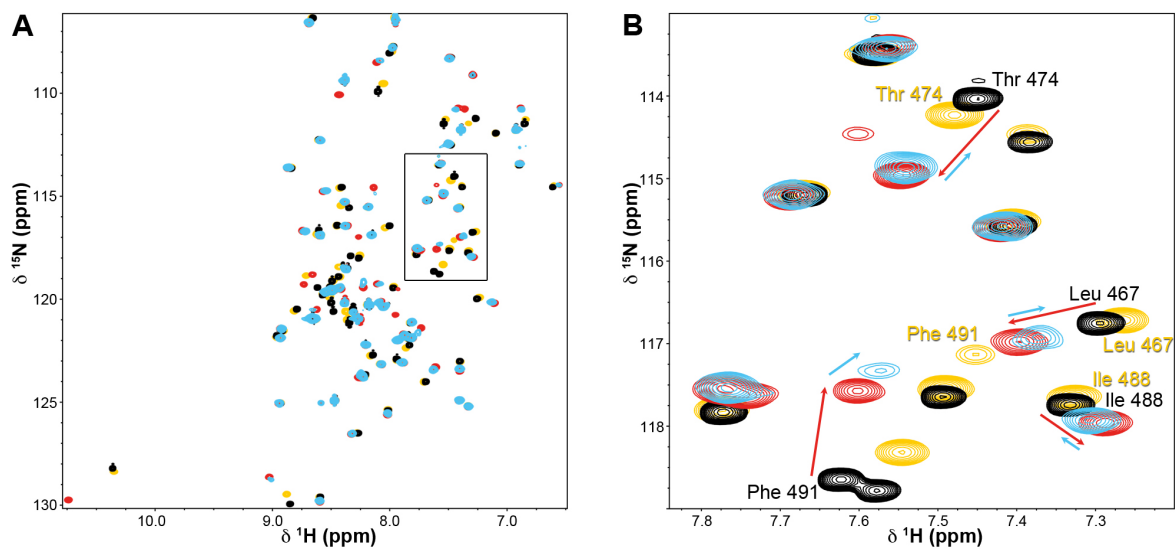

**Supplementary Figure S7. NusG-NTD:NusA-AR2 interaction in the presence of RNAP. (A)** [ $^1\text{H}$ ,  $^{15}\text{N}$ ]-HSQC displacement experiment of  $^{15}\text{N}$ -NusA-AR2 from  $\alpha\text{CTD}$  by NusG-NTD. Black,  $^{15}\text{N}$ -NusA-AR2 (100  $\mu\text{M}$ ); red,  $^{15}\text{N}$ -NusA-AR2: $\alpha\text{CTD}$  = 1:1 (100  $\mu\text{M}$  each); blue,  $^{15}\text{N}$ -NusA-AR2: $\alpha\text{CTD}$ :NusG-NTD = 1:1:5; yellow,  $^{15}\text{N}$ -NusA-AR2:NusG-NTD = 1:3. **(B)** Detail of **(A)**. Red arrows, chemical shift changes of  $^{15}\text{N}$ -NusA-AR2 upon  $^{15}\text{N}$ -NusA-AR2: $\alpha\text{CTD}$  complex formation; blue arrows, chemical shift changes of  $^{15}\text{N}$ -NusA-AR2 upon addition of NusG-NTD.

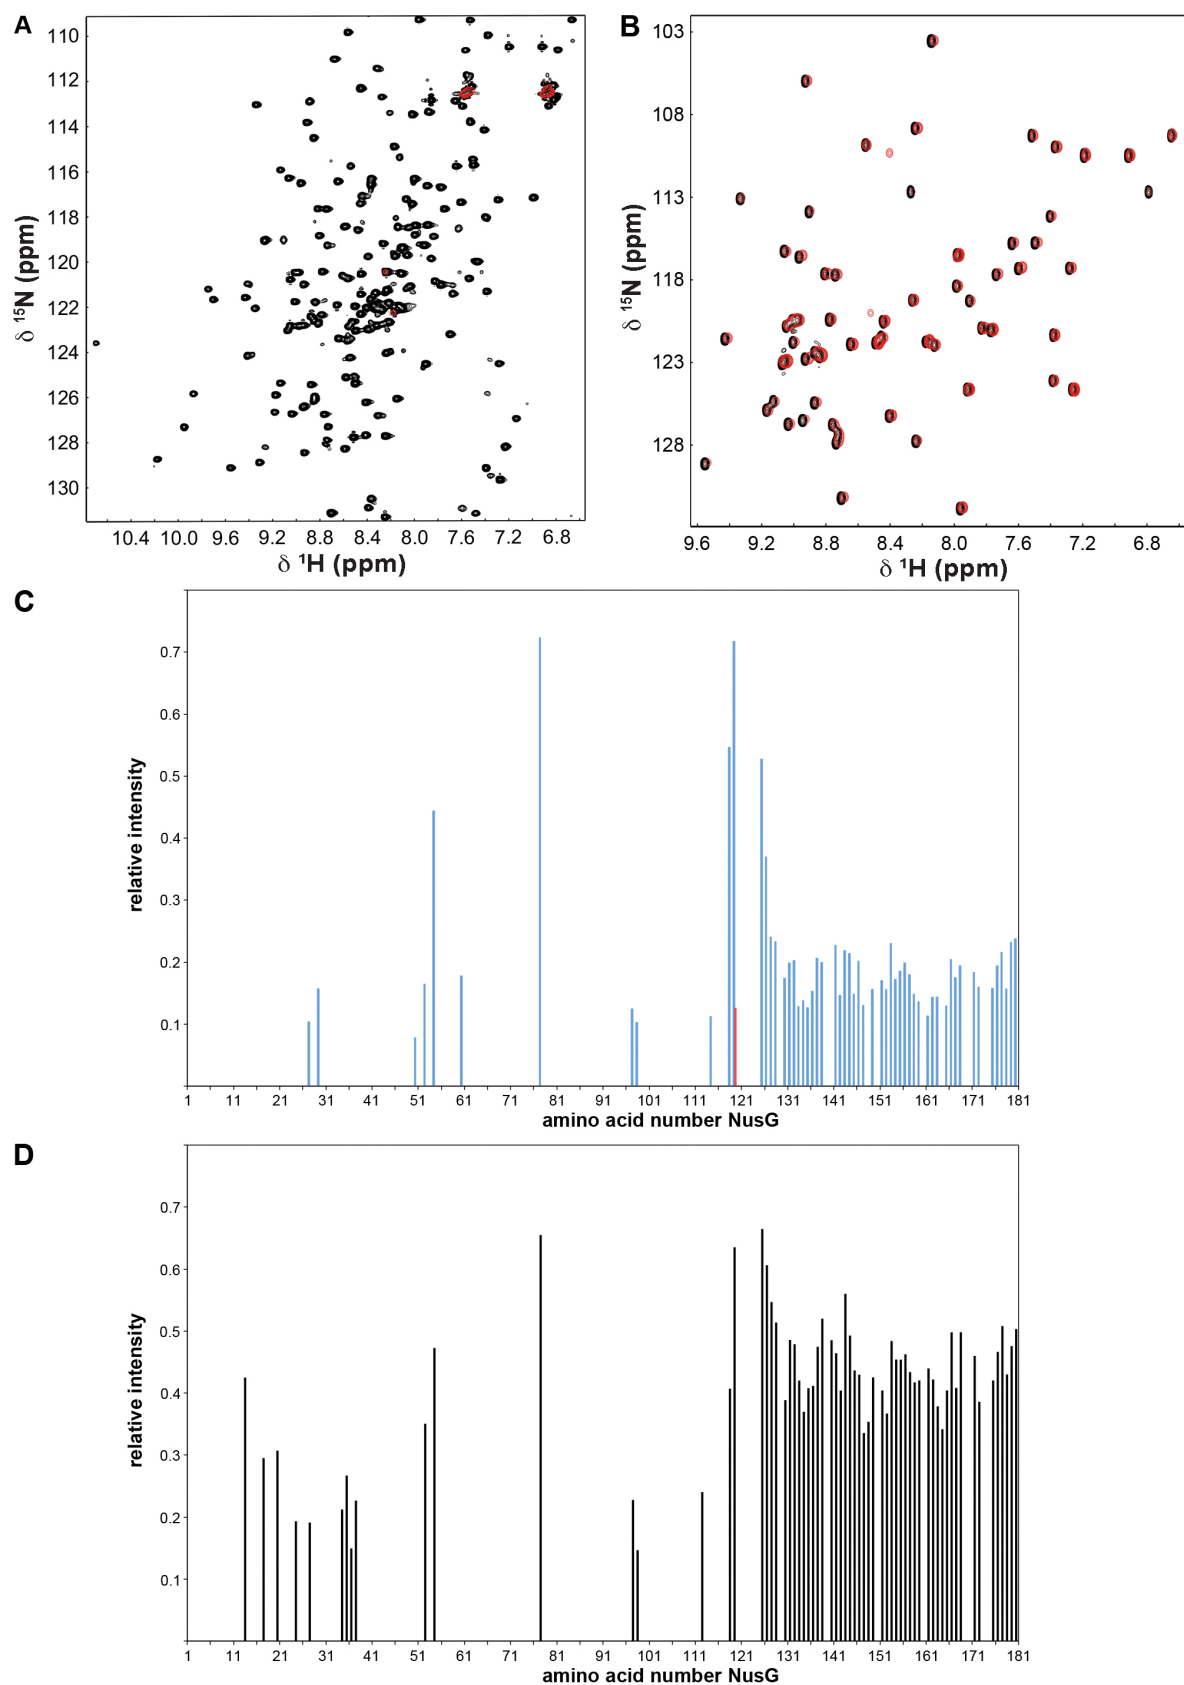

**Supplementary Figure S8. NusG:RNAP vs. NusG:NusA vs. NusA:NusG.** (A)  $[\text{}^1\text{H}, \text{}^{15}\text{N}]$ -HSQC spectrum of  $50\ \mu\text{M}$   $\text{}^{15}\text{N}$ -NusG in the absence, black, or presence, red, of RNAP in equimolar

concentration. **(B)** [ $^1\text{H}$ ,  $^{15}\text{N}$ ]-HSQC spectrum of  $50\ \mu\text{M}$   $^{15}\text{N}$ -NusG-CTD in the absence, black, or presence, red, of RNAP in equimolar concentration. **(C)** NusG binds to NusA in the presence of RNAP. Intensity plots of the titration of Fig. 4C. Relative intensities were calculated in respect to free NusG. Blue,  $^{15}\text{N}$ -NusG:NusA = 1:1; red,  $^{15}\text{N}$ -NusG:NusA:RNAP = 1:1:1 **(D)** NusG:NusA-AR2 complex remains intact in the presence of RNAP. Intensity plot of the displacement experiment in Fig. 4D. Relative intensities were calculated as ratio of intensities of  $^{15}\text{N}$ -NusG signals in the presence of NusA-AR2 and RNAP (1:1:1) and  $^{15}\text{N}$ -NusG signals in the presence of NusA-AR2 (1:1).
